# Supplementary material for: Exploring Constipation as a Mediator in the Association Between Amyotrophic Lateral Sclerosis Progression and Survival: A Multicenter Prospective Cohort Study
Source: Research Square preprint supplement (doi:10.21203/rs.3.rs-8560995/v1), 2026-01-22
Supplement: Supplementary file 1 [file 0a2c592916d5c9d07790c723.xlsx]

## Sheet: 20250201
Constiaption 01								Constiaption 02
	estHR	lowerHR	upperRR	Evalue.estHR	Evalue.lowerHR	Evalue.upperHR			estHR	lowerHR	upperRR	Evalue.estHR	Evalue.lowerHR	Evalue.upperHR
Rcde	1.56401	0.978425	2.715	2.50323	1	NA		Rcde	2.41543	0.957318	6.5023	4.26444	1	NA
Rpnde	2.2773	1.74239	3.80996	3.98282	2.87972	NA		Rpnde	4.97112	3.01871	12.283	9.4142	5.4873	NA
Rtnde	2.34937	1.77885	4.06003	4.12988	2.9559	NA		Rtnde	5.39626	3.13947	14.5674	10.2669	5.73115	NA
Rpnie	1.1221	0.965655	1.53008	1.49225	1	NA		Rpnie	1.28639	0.954924	1.85781	1.89336	1	NA
Rtnie	1.15948	1.00908	1.59612	1.58949	1.10478	NA		Rtnie	1.42118	1.12294	2.00063	2.19486	1.4945	NA
Rte	2.61846	2.02228	4.70232	4.67706	3.4601	NA		Rte	6.58908	4.17962	16.6443	12.6576	7.82512	NA
Anxiety 01								Anxiety 02
estHR	lowerHR	upperRR	Evalue.estHR	Evalue.lowerHR	Evalue.upperHR				estHR	lowerHR	upperRR	Evalue.estHR	Evalue.lowerHR	Evalue.upperHR
Rcde	2.56216	1.95737	4.5945	4.56279	3.32629	NA		Rcde	5.89825	3.67518	15.3698	11.2733	6.81074	NA
Rpnde	2.63322	2.00387	4.61578	4.70702	3.42218	NA		Rpnde	6.2085	4.01941	16.8356	11.8951	7.50313	NA
Rtnde	2.63735	2.0047	4.56734	4.71539	3.42389	NA		Rtnde	6.2079	3.96887	16.2217	11.8938	7.40153	NA
Rpnie	1.0014	0.872799	1.16738	1.03885	1	NA		Rpnie	0.999952	0.816107	1.22237	1.00696	NA	1
Rtnie	1.00308	0.887147	1.12047	1.05868	1	NA		Rtnie	0.999828	0.746638	1.23846	1.01329	NA	1
Rte	2.64079	1.96736	4.66836	4.72238	3.34691	NA		Rte	6.20766	4.01413	16.9225	11.8934	7.49251	NA
Depression 01								Depression 02
	estHR	lowerHR	upperRR	Evalue.estHR	Evalue.lowerHR	Evalue.upperHR		estHR	lowerHR	upperRR	Evalue.estHR	Evalue.lowerHR	Evalue.upperHR
Rcde	2.33085	1.70824	4.30638	4.0921	2.80816	NA		Rcde	5.01445	2.85602	13.8053	9.50112	5.15838	NA
Rpnde	2.74503	1.99986	4.7926	4.93368	3.41393	NA		Rpnde	7.34419	4.54378	20.4348	14.1701	8.55652	NA
Rtnde	2.67869	2.05679	4.93352	4.79924	3.53111	NA		Rtnde	7.01956	4.82154	20.9126	13.5199	9.11406	NA
Rpnie	1.00695	0.891752	1.152	1.09061	1	NA		Rpnie	1.00679	0.837125	1.21933	1.08946	1	NA
Rtnie	0.980783	0.898519	1.18192	1.16094	NA	1		Rtnie	0.948624	0.745771	1.58407	1.2931	NA	1
Rte	2.69601	2.03357	4.97675	4.83434	3.48334	NA		Rte	7.05588	4.92755	20.5873	13.5927	9.32677	NA
Sleep 01								Sleep 02
estHR	lowerHR	upperRR	Evalue.estHR	Evalue.lowerHR	Evalue.upperHR				estHR	lowerHR	upperRR	Evalue.estHR	Evalue.lowerHR	Evalue.upperHR
Rcde	2.00573	1.18416	4.6546	3.42602	1.65114	NA		Rcde	3.84168	1.40126	15.7073	7.14574	2.1511	NA
Rpnde	2.6129	1.94144	4.60063	4.66578	3.29338	NA		Rpnde	6.27645	3.99097	16.9428	12.0312	7.44595	NA
Rtnde	2.63285	1.99086	4.62313	4.70626	3.39537	NA		Rtnde	6.42073	4.05074	17.5927	12.3203	7.5661	NA
Rpnie	0.999877	0.876102	1.12341	1.01122	NA	1		Rpnie	0.999743	0.812585	1.16806	1.01628	NA	1
Rtnie	1.00806	0.945646	1.13296	1.09817	1	NA		Rtnie	1.02928	0.892948	1.24533	1.20289	1	NA
Rte	2.63255	1.95677	4.71331	4.70565	3.32505	NA		Rte	6.41945	4.0877	17.3101	12.3177	7.64038	NA

## Sheet: Sheet2
Rcde: controlled direct effect hazard ratio;
Rpnde: pure natural direct effect hazard ratio;
Rtnde: total natural direct effect hazard ratio;
Rpnie: pure natural indirect effect hazard ratio;
Rtnie: total natural indirect effect hazard ratio
Rte: total effect hazard ratio
